# Supplementary material
Source: MDPI journal article supplement (https://www.mdpi.com/2073-4352/13/1/7)

# Supplementary material of the Article in *Crystals*

**A tetranuclear Ni(II)-cubane cluster molecule build by four  $\mu_3$ -O-methanolate (MeO) ligands, externally cohesive by four unprecedented bridging  $\mu_2$ -N7,O6-acyclovirate (acv-H) anions.**

by

**Jeannette Carolina Belmont-Sánchez<sup>1</sup>, Duane Choquesillo-Lazate<sup>2</sup>,  
Ricardo Navarrete-Casas<sup>1</sup>, Antonio Frontera<sup>3</sup>, Alfonso Cartiñeiras<sup>4</sup>,  
Juan Niclós-Gutiérrez<sup>1</sup>, Antonio Matilla-Hernández<sup>1,\*</sup>**

## Contents

|     |                                                                                                                                                           |    |
|-----|-----------------------------------------------------------------------------------------------------------------------------------------------------------|----|
| S1. | Crystals of compound $[\text{Ni}(\mu_2\text{-N7,O6-acv-H})(\mu_3\text{-MeO})(\text{H}_2\text{O})]_4 \cdot 8\text{H}_2\text{O}$ ( <b>1</b> ).              | 2  |
| S2. | Supplementary structural information of compound <b>1</b> .                                                                                               | 3  |
| S3. | FT-IR spectrum (KBr disk) of compound <b>1</b> .                                                                                                          | 5  |
| S4. | TGA study of compound <b>1</b> with FT-IR spectra to identification of evolved gases.                                                                     | 6  |
|     | S4.1. TGA curve versus time (abscissas) and temperature (right ordinates).                                                                                | 6  |
|     | S4.2. First derivative of TGA curve, to decide the beginning and end of steps.                                                                            | 7  |
|     | S4.3. TGA curve of weight versus temperature, with data of partial or total experimental weight loss (in mg or %).                                        | 8  |
|     | S4.4. Plot for all losses gases (up) and for CO <sub>2</sub> , water and methanol versus time (min), as monitored by continuous IR spectra.               | 9  |
|     | S4.5. IR spectra of pure samples of the observed evolved gases.                                                                                           | 9  |
|     | S4.6. Sheets with thirty-seven time-spaced IR spectra to identify evolved gases..                                                                         | 10 |
|     | S4.7. Selected of four time-spaced IR spectra enhancing the production of methanol, during the step 3 (first two spectra) and the step 4 (the two below). | 13 |

Figure S1. Crystals of compound  $[\text{Ni}(\mu_2\text{-N7,O6-acv-H})(\mu_3\text{-MeO})(\text{H}_2\text{O})]_4 \cdot 8\text{H}_2\text{O}$  (1).

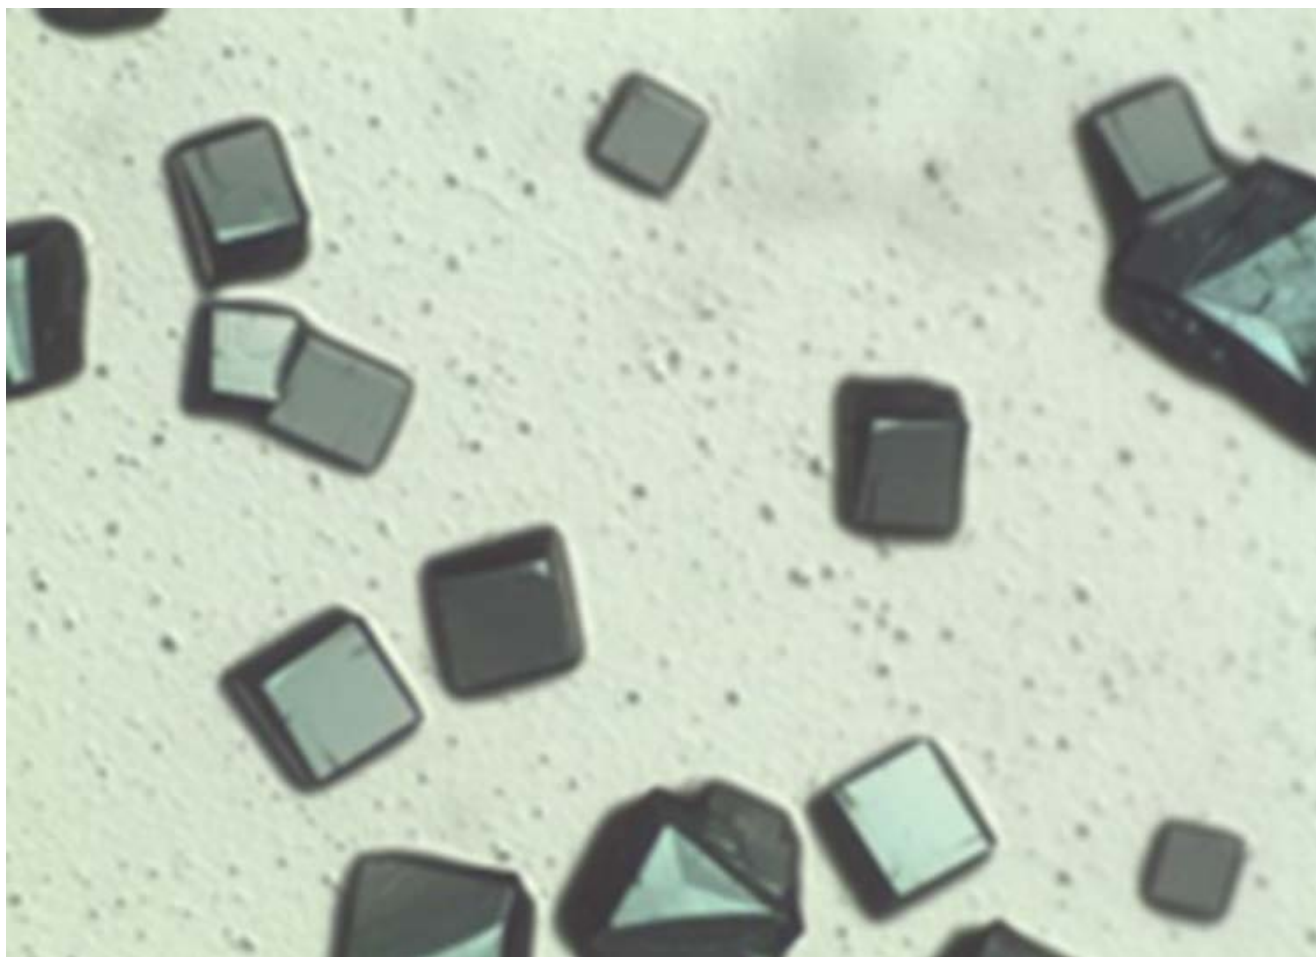

## S2. Supplementary structural information of compound 1.

Table A. Selected bond lengths [Å] and angles [deg] for [Ni(acv)(MeO)(H<sub>2</sub>O)]4.8H<sub>2</sub>O.

|                      |            |
|----------------------|------------|
| Ni(1)-O(1)           | 2.038(2)   |
| Ni(1)-O(1)#1         | 2.041(3)   |
| Ni(1)-O(1)#2         | 2.049(2)   |
| Ni(1)-O(16)          | 2.054(2)   |
| Ni(1)-N(17)          | 2.069(3)   |
| Ni(1)-O(2)           | 2.131(3)   |
| Ni(1)-Ni(1)#3        | 3.0527(10) |
| Ni(1)-Ni(1)#1        | 3.0527(10) |
| Ni(1)-Ni(1)#2        | 3.0657(11) |
| O(1)-O(1)#2          | 2.694(5)   |
| O(1)-O(1)#3          | 2.701(4)   |
| O(1)-O(1)#1          | 2.701(4)   |
| O(1)-Ni(1)-O(1)#1    | 82.94(10)  |
| O(1)-Ni(1)-O(1)#2    | 82.44(10)  |
| O(1)#1-Ni(1)-O(1)#2  | 82.66(11)  |
| O(1)-Ni(1)-O(16)     | 175.74(10) |
| O(1)#1-Ni(1)-O(16)   | 96.29(10)  |
| O(1)#2-Ni(1)-O(16)   | 93.30(10)  |
| O(1)-Ni(1)-N(17)     | 94.82(10)  |
| O(1)#1-Ni(1)-N(17)   | 95.31(11)  |
| O(1)#2-Ni(1)-N(17)   | 176.76(12) |
| O(16)-Ni(1)-N(17)    | 89.43(11)  |
| O(1)-Ni(1)-O(2)      | 91.31(10)  |
| O(1)#1-Ni(1)-O(2)    | 171.96(11) |
| O(1)#2-Ni(1)-O(2)    | 91.04(10)  |
| O(16)-Ni(1)-O(2)     | 89.03(10)  |
| N(17)-Ni(1)-O(2)     | 90.75(12)  |
| Ni(1)-O(1)-Ni(1)#3   | 96.90(11)  |
| Ni(1)-O(1)-Ni(1)#2   | 97.18(10)  |
| Ni(1)#3-O(1)-Ni(1)#2 | 96.54(10)  |

Symmetry transformations used to generate equivalent atoms:

#1 -z+1/4, -y+3/4, x      #2 -x+1/4, y, -z+1/4

#3 z, -y+3/4, -x+1/4

Table B. Hydrogen bonds for [Ni(acv)(MeO)(H<sub>2</sub>O)]4.8H<sub>2</sub>O [Å and deg.].

| D-H...A               | d(D-H) | d(H...A) | d(D...A) | <(DHA) |
|-----------------------|--------|----------|----------|--------|
| O(2)-H(2A)...O(4)#4   | 0.98   | 1.77     | 2.714(6) | 159.8  |
| N(12)-H(12A)...O(4)#5 | 0.84   | 2.15     | 2.935(6) | 156.4  |

Symmetry transformations used to generate equivalent atoms:

#1 -z+1/4, -y+3/4, x      #2 -x+1/4, y, -z+1/4      #3 z, -y+3/4, -x+1/4

#4 y, z, x      #5 -x, -y+1/2, -z+1/2

Table C. Selected data for  $\pi$ -sacking interactions between the six-membered ring of guanine moieties of acv-H.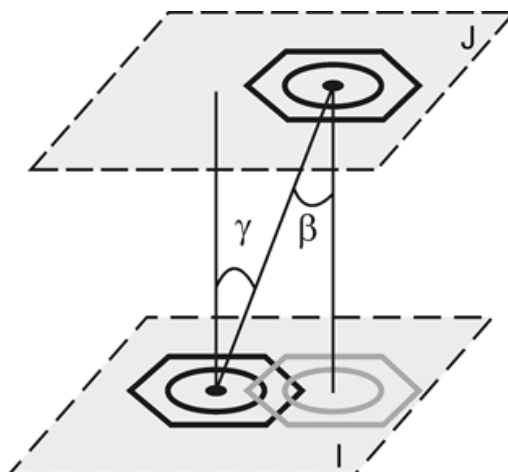

=====

Analysis of Short Ring-Interactions with Cg-Cg Distances < 6.0 Angstrom and Beta < 60.0Deg.

=====

- Cg(I) = Plane number I (= ring number in () above)
  - Alpha = Dihedral Angle between Planes I and J (Deg)
  - Beta = Angle Cg(I)-->Cg(J) or Cg(I)-->Me vector and normal to plane I (Deg)
  - Gamma = Angle Cg(I)-->Cg(J) vector and normal to plane J (Deg)
  - Cg-Cg = Distance between ring Centroids (Ang.)
  - CgI\_Perp = Perpendicular distance of Cg(I) on ring J (Ang.)
  - CgJ\_Perp = Perpendicular distance of Cg(J) on ring I (Ang.)
  - Slippage = Distance between Cg(I) and Perpendicular Projection of Cg(J) on Ring I (Ang).
  - P,Q,R,S = J-Plane Parameters for Carth. Coord. (Xo, Yo, Zo)
- =====

6-Membered Ring (21) N(11) --> C(12) --> N(13) --> C(14) --> C(15) --> C(16)a -->

6-Membered Ring (22) C(16) --> N(11)c --> C(12)c --> N(13)c --> C(14)c --> C(15)c -->

=====

| Cg(I)  | Res(I) | Cg(J)     | [ ARU(J)]   | Cg-Cg Transformed J-Plane P, Q, R, S |         |        |         | Alpha   | Beta | Gamma | CgI_Perp | CgJ_Perp | Slippage |
|--------|--------|-----------|-------------|--------------------------------------|---------|--------|---------|---------|------|-------|----------|----------|----------|
| Cg(21) | [ 1]   | -> Cg(21) | [ 10554.10] | 3.7561                               | -0.2580 | 0.6911 | -0.6752 | 10.2640 | 1    | 25.32 | 25.32    | -3.3954  | -3.3954  |
| Cg(22) | [ 1]   | -> Cg(22) | [ 6455.10]  | 3.7561                               | -0.6752 | 0.6911 | 0.2580  | 6.8318  | 1    | 25.32 | 25.32    | 3.3954   | 3.3954   |
|        |        |           |             | Min or Max                           | 3.745   |        |         |         | 0.67 | 1.98  | 89.44    | -3.421   | -5.352   |

[ 1555] = X,Y,Z  
 [103555] = 1/4-X,Y,1/4-Z  
 [ 6455] = -1/4+Y,1/4+X,-Z

=====

### S3. FT-IR spectrum (KBr disk) of compound 1.

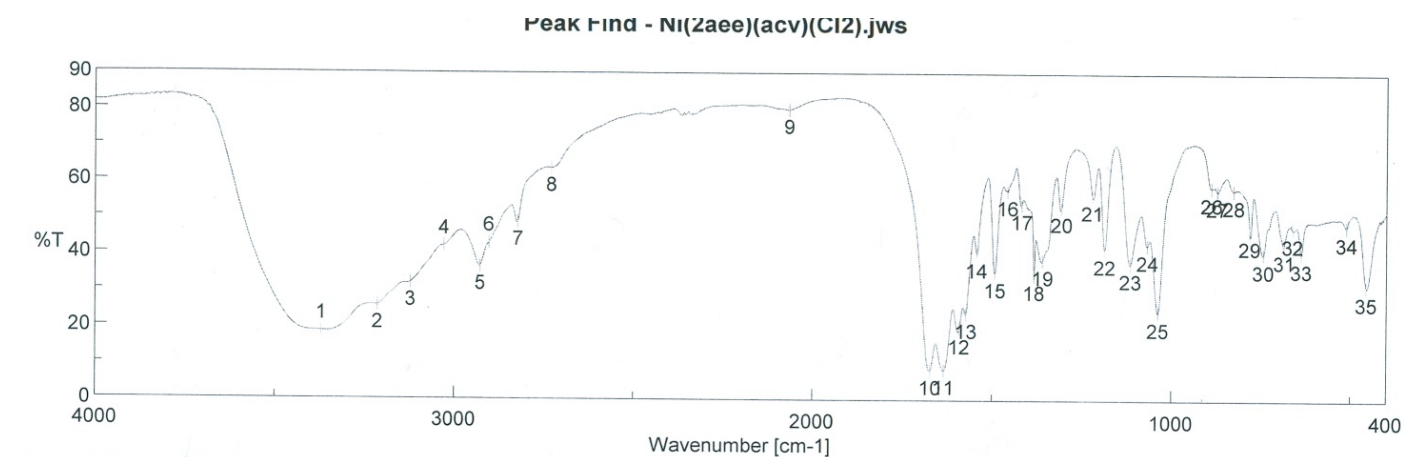

[ Result of Peak Picking ]

| No. | Position | Intensity | No. | Position | Intensity | No. | Position | Intensity |
|-----|----------|-----------|-----|----------|-----------|-----|----------|-----------|
| 1   | 3369.51  | 18.54     | 2   | 3212.34  | 25.6522   | 3   | 3122.19  | 31.8255   |
| 4   | 3028.66  | 41.9277   | 5   | 2927.89  | 36.3618   | 6   | 2903.79  | 42.8008   |
| 7   | 2823.76  | 48.4978   | 8   | 2730.71  | 63.3809   | 9   | 2065.87  | 79.8039   |
| 10  | 1671.98  | 8.20386   | 11  | 1634.38  | 8.29311   | 12  | 1591.95  | 19.491    |
| 13  | 1573.63  | 23.7284   | 14  | 1544.22  | 40.2333   | 15  | 1493.6   | 34.8934   |
| 16  | 1458.89  | 57.4153   | 17  | 1418.87  | 53.5897   | 18  | 1384.64  | 34.2486   |
| 19  | 1360.53  | 38.286    | 20  | 1307.5   | 52.9018   | 21  | 1222.17  | 56.0861   |
| 22  | 1187.45  | 41.2979   | 23  | 1115.62  | 37.3534   | 24  | 1067.89  | 42.4665   |
| 25  | 1038.48  | 24.0948   | 26  | 889.505  | 58.3826   | 27  | 873.596  | 57.4321   |
| 28  | 828.277  | 57.6666   | 29  | 782.958  | 46.4963   | 30  | 745.835  | 40.0812   |
| 31  | 687.498  | 42.7729   | 32  | 663.393  | 47.1947   | 33  | 639.287  | 40.338    |
| 34  | 511.526  | 47.619    | 35  | 456.082  | 31.374    |     |          |           |

**S4. TGA study of compound 1 with FT-IR spectra to identification of evolved gases.****S4.1. TGA curve versus time (abscissas) and temperature (right ordinates).**

File Name: 18C-0055.D20  
Detector Type: Shimadzu TGA-50H  
Acquisition Date: 11/11/30  
Acquisition Time: 08:45:37  
Sample Name: C-884  
Weight: 9.382[mg]  
Cell: Alumina  
Atmosphere: Air  
Rate Flow: 100.0[ml/min]  
Operator: MASP

**C-884**

| Temp Program |           |           |
|--------------|-----------|-----------|
| Rate         | Hold Temp | Hold Time |
| [C/min]      | [C]       | [min]     |
| 10.0         | 950.0     | 0.0       |

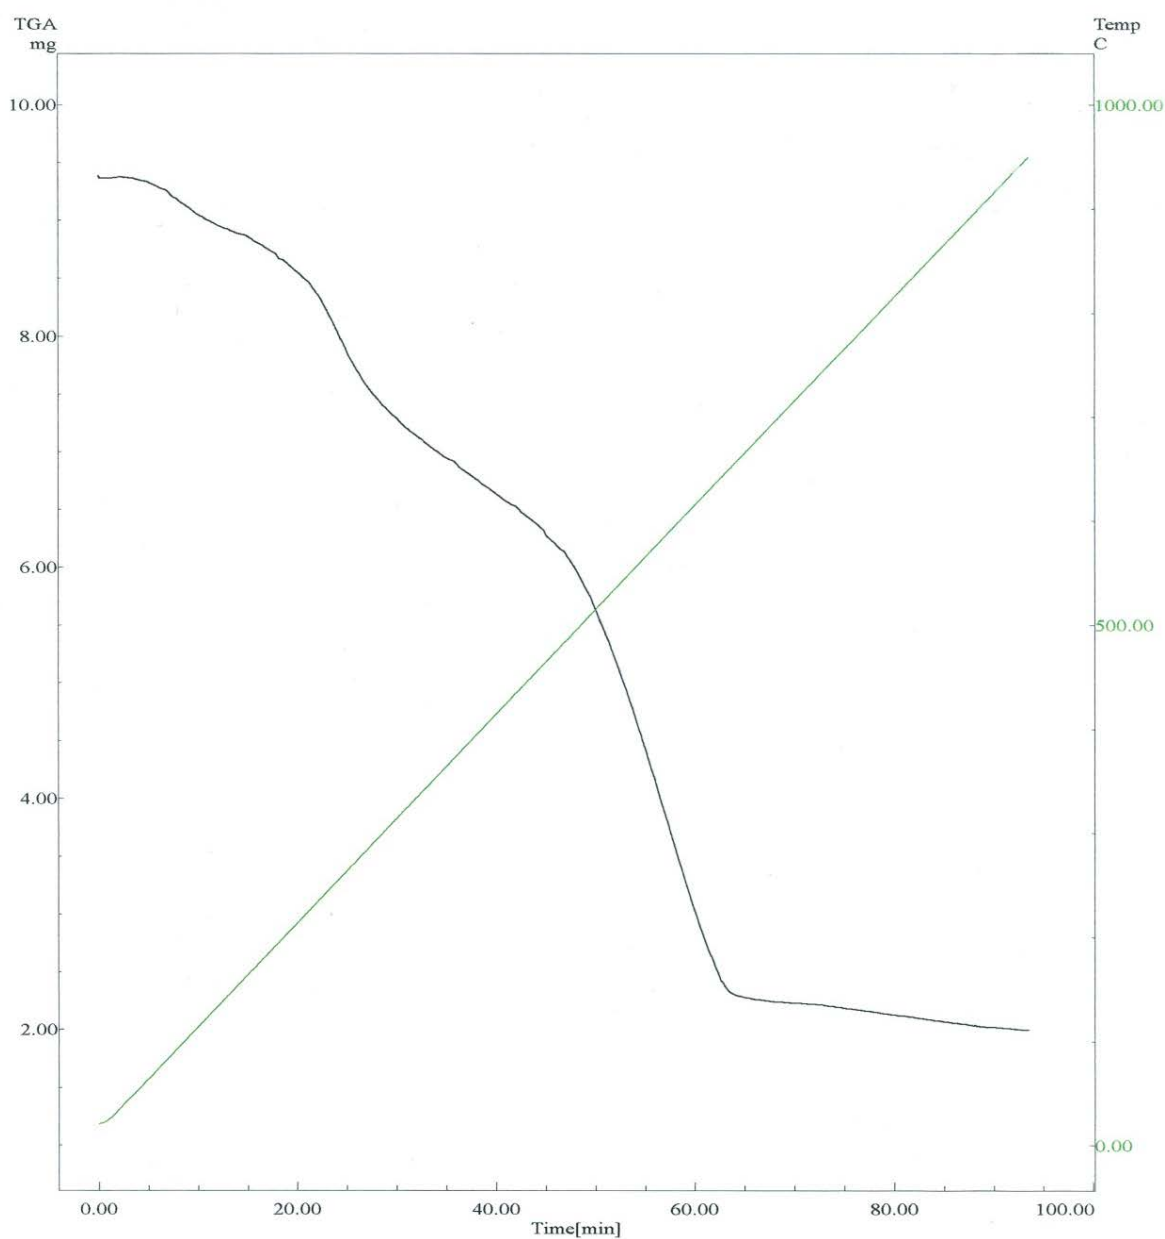

# S4.2. First derivative of TGA curve, to decide the beginning and end of steps.

Unidades de TA y UVNIR  
Centro de Instrumentación Científica  
Universidad de Granada

File Name: 18C-0055.D20  
Detector Type: Shimadzu TGA-50H  
Acquisition Date: 11/11/30  
Acquisition Time: 08:45:37  
Sample Name: C-884  
Weight: 9.382[mg]  
Cell: Alumina  
Atmosphere: Air  
Rate Flow: 100.0[ml/min]  
Operator: MASP

**C-884**

Temp Program  
Rate Hold Temp Hold Time  
[C/min] [C] [min]  
10.0 950.0 0.0

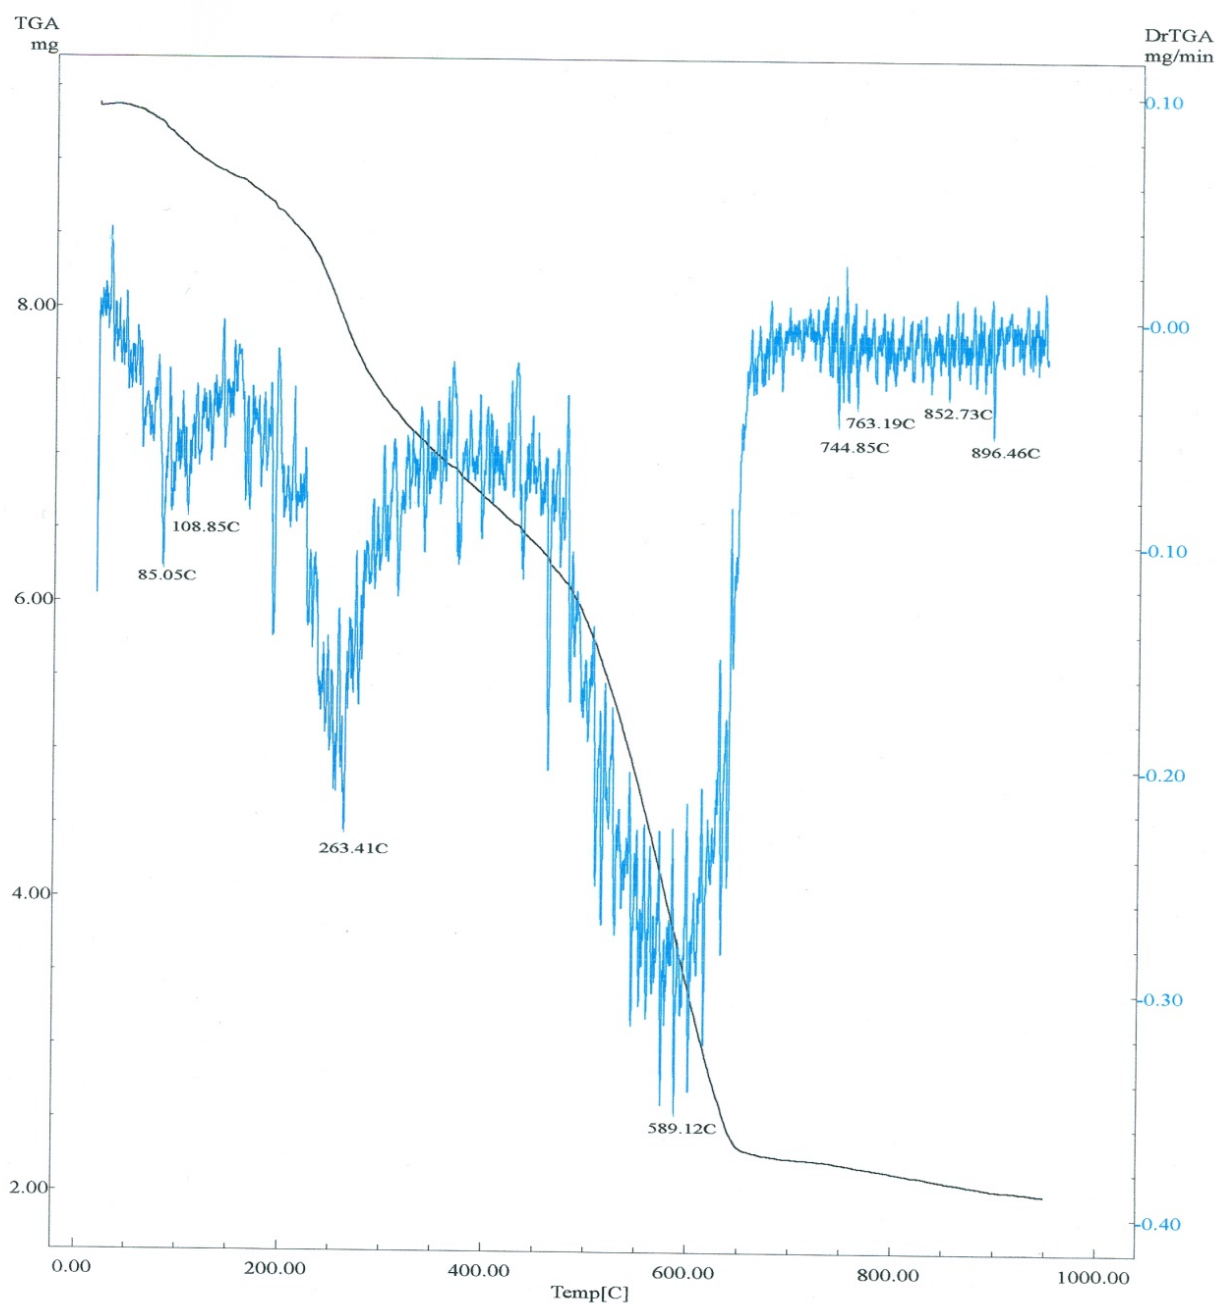

S4.3. TGA curve of weight versus temperature, with data of partial or total experimental weight loss (in mg or %).

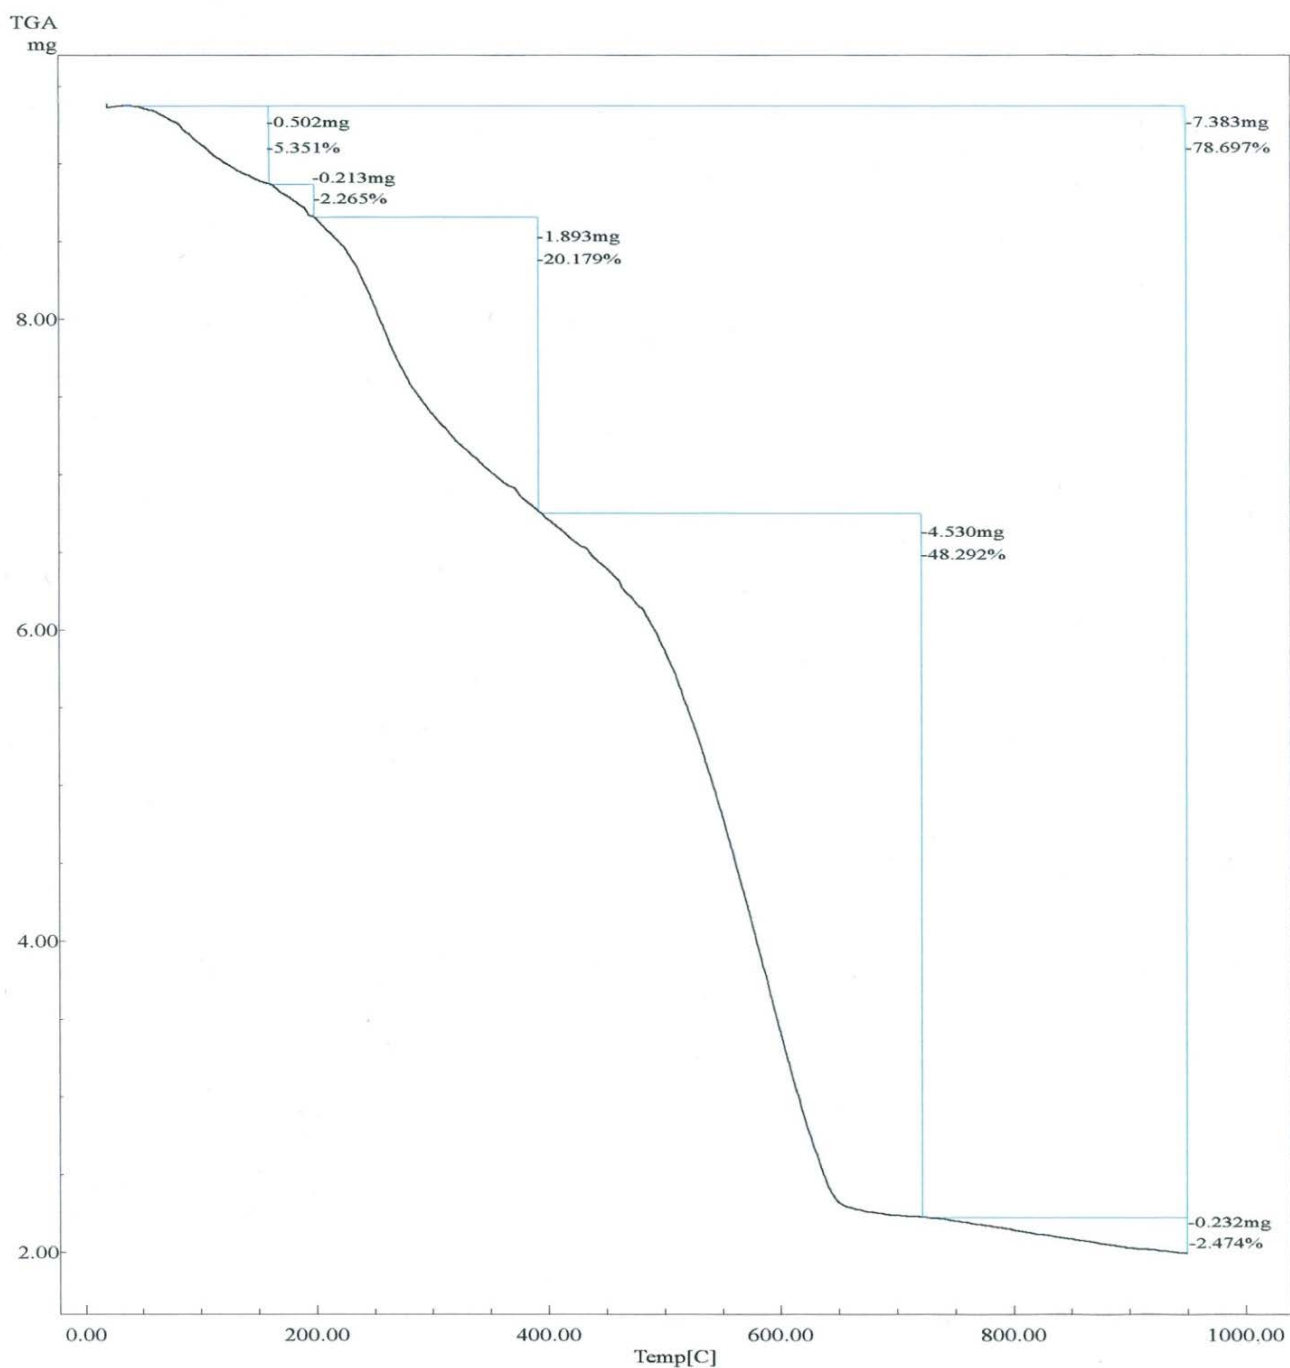



S4.4. Plot for all losses gases (up) and for CO<sub>2</sub>, water and methanol versus time (min), as monitored by continuous IR spectra.

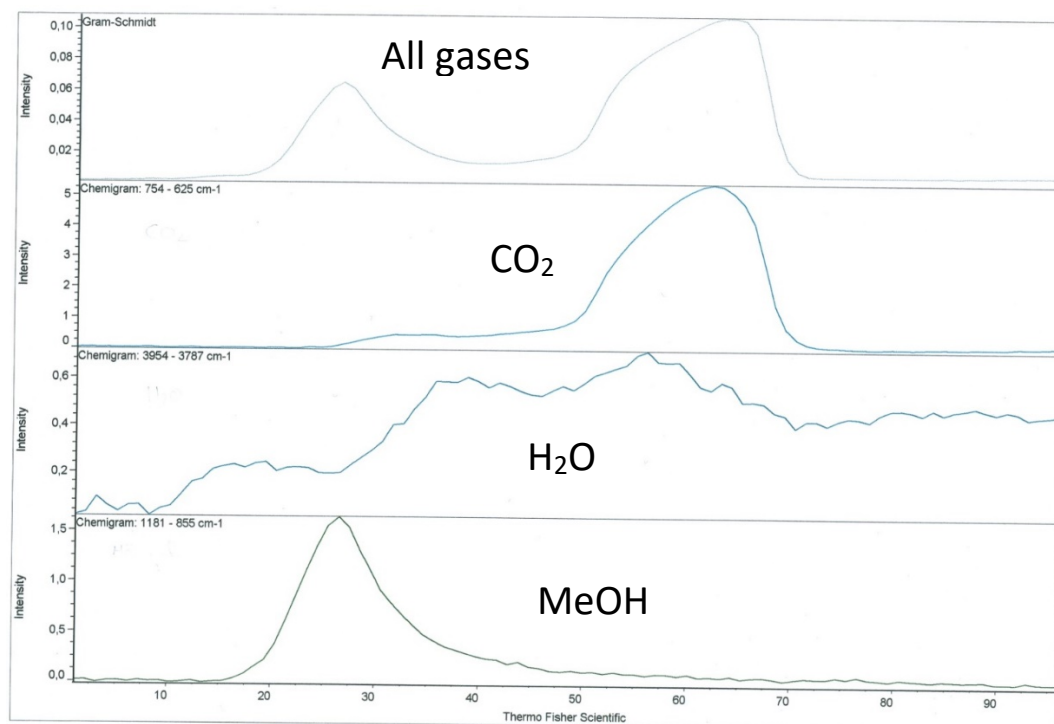

S4.5. FT-IR spectra of pure samples of the observed evolved gases.

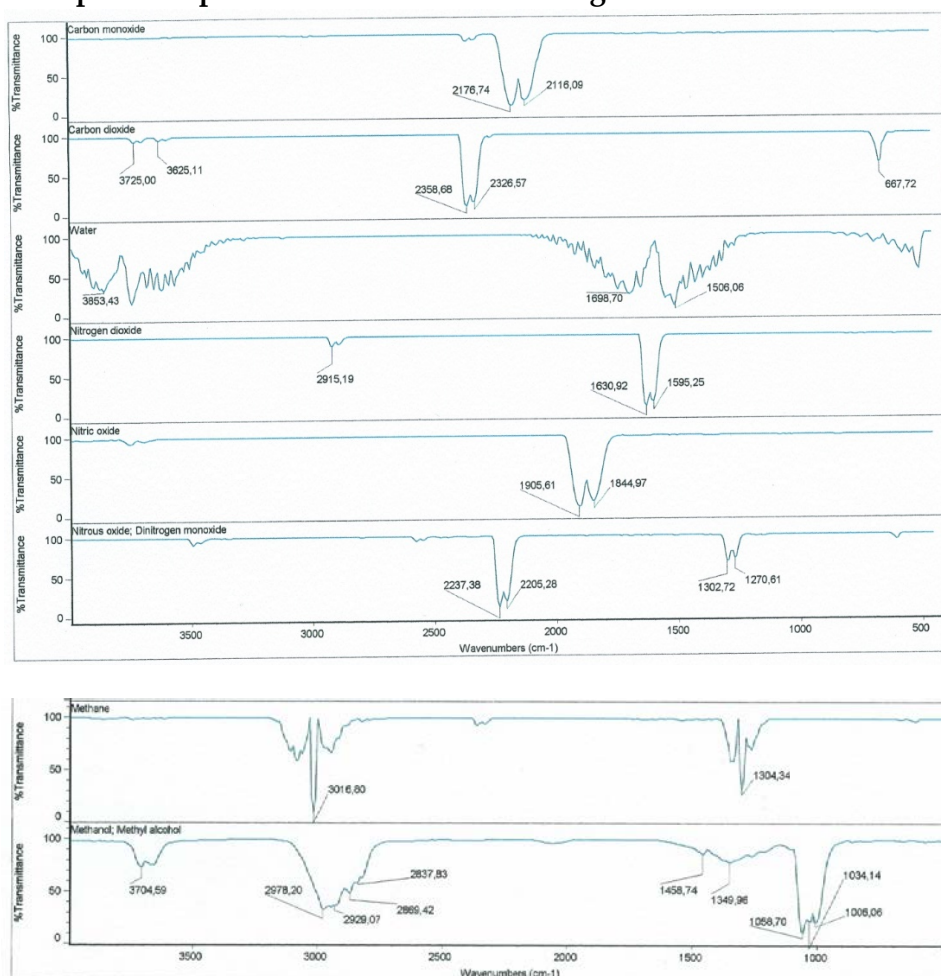

#### S4.6. Sheets with thirty-seven time-spaced IR spectra to identify evolved gases.

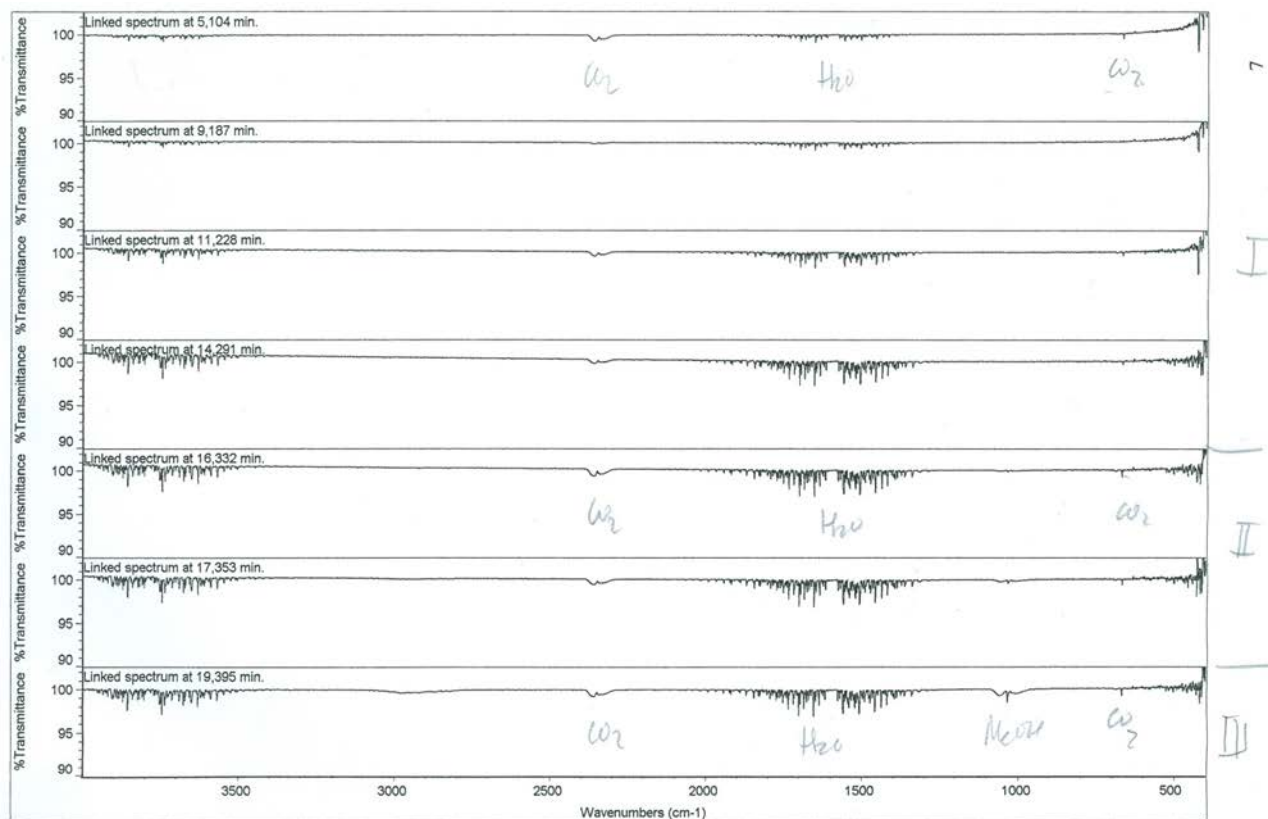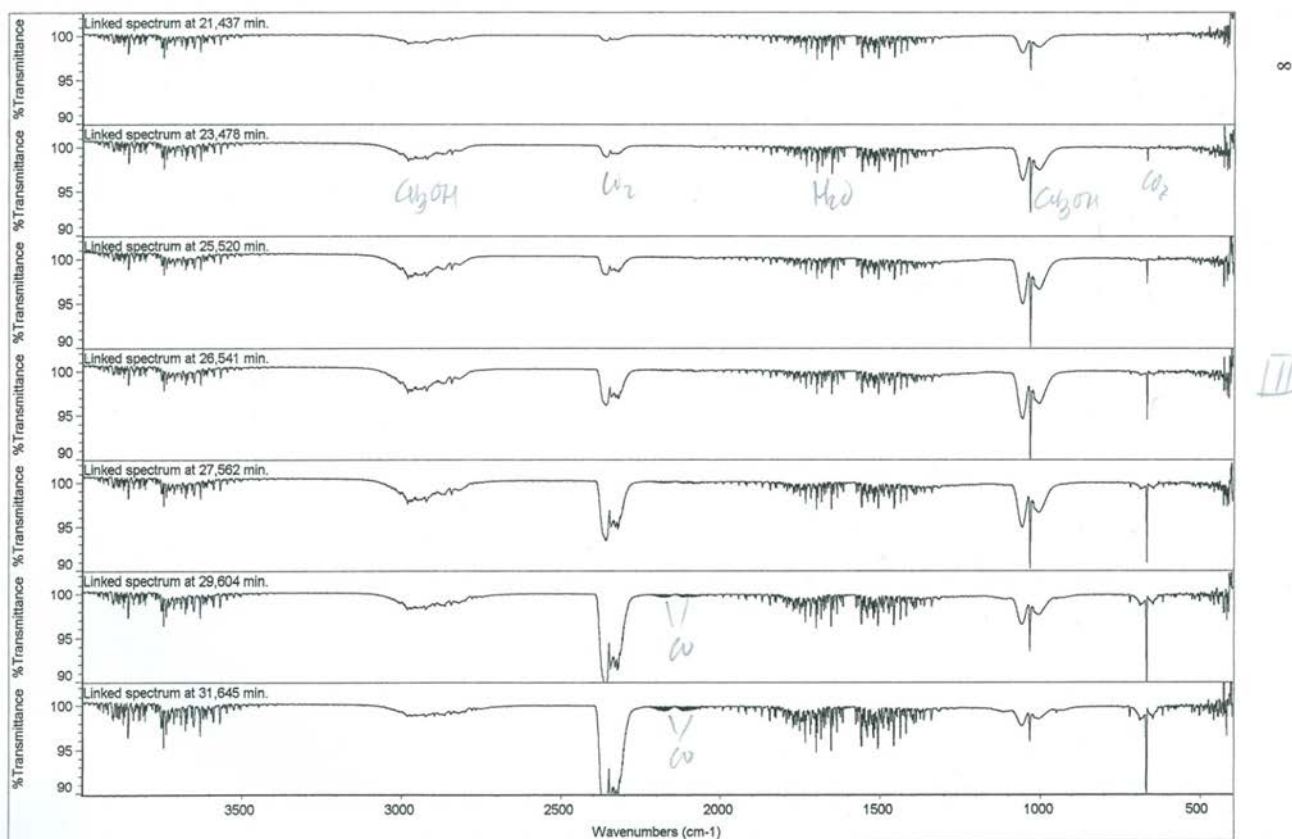

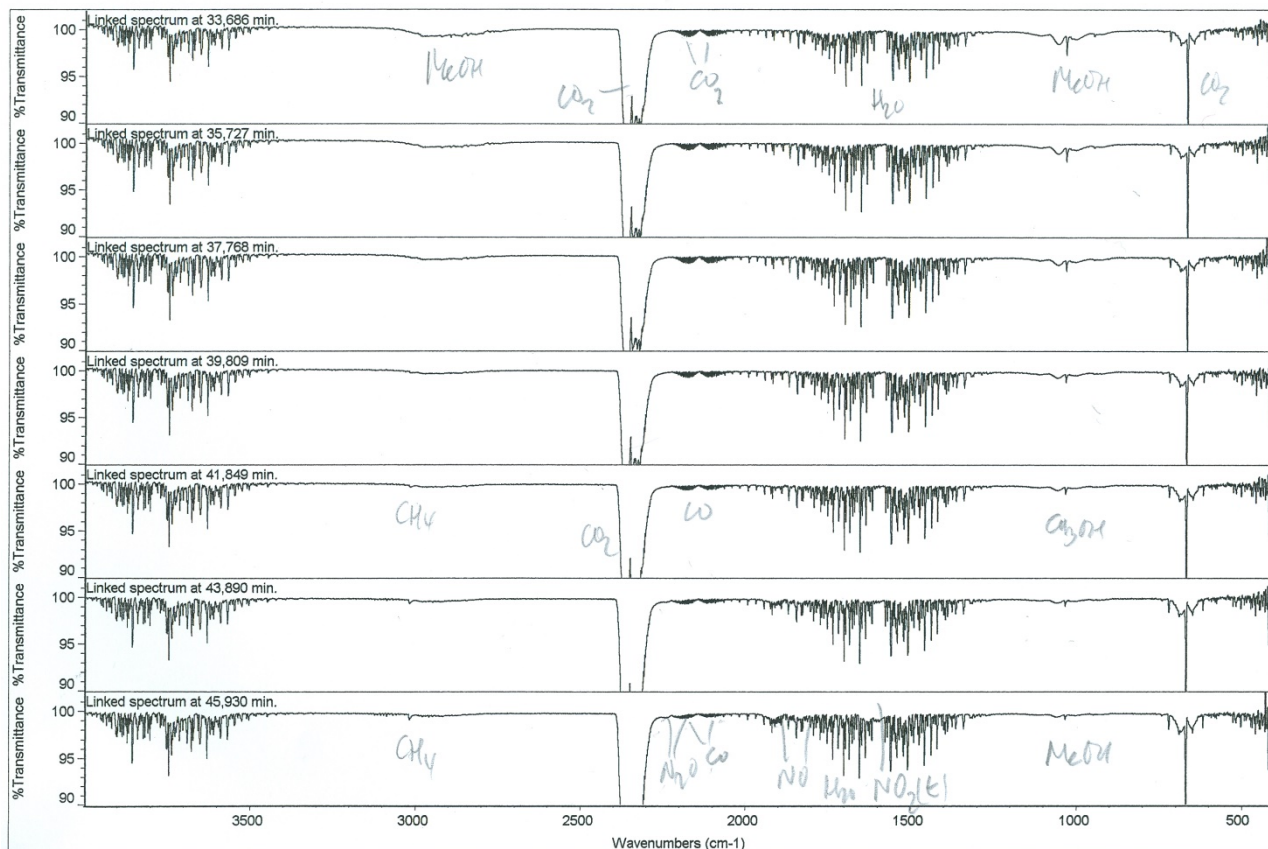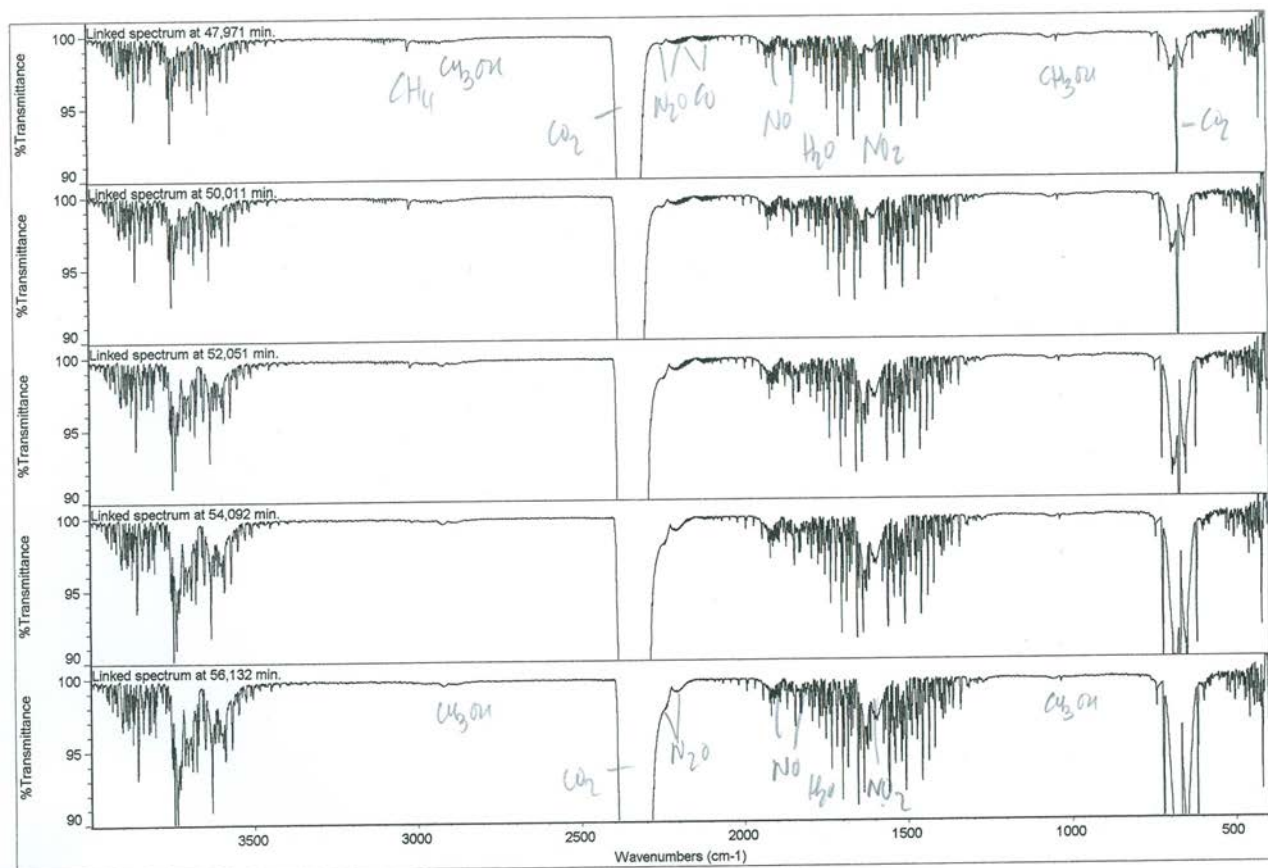



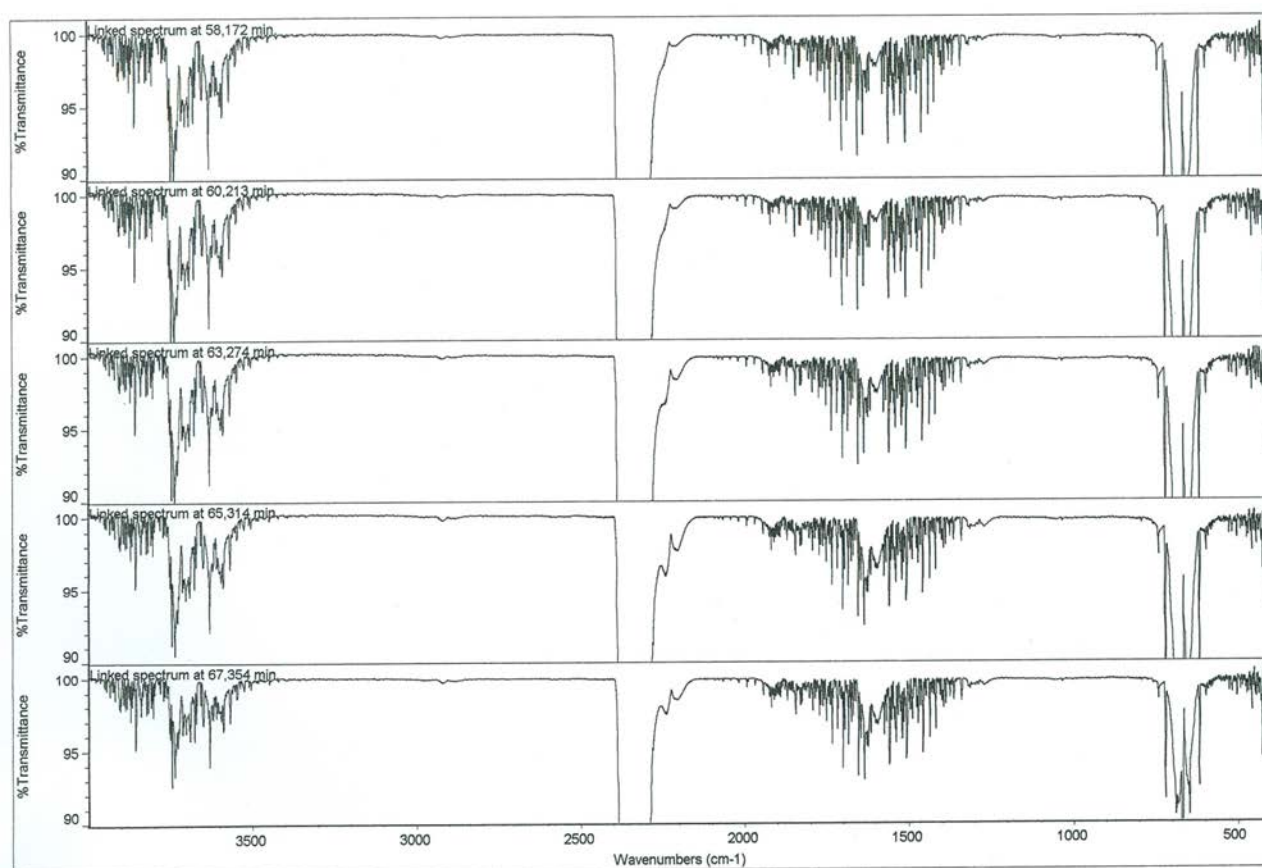

12

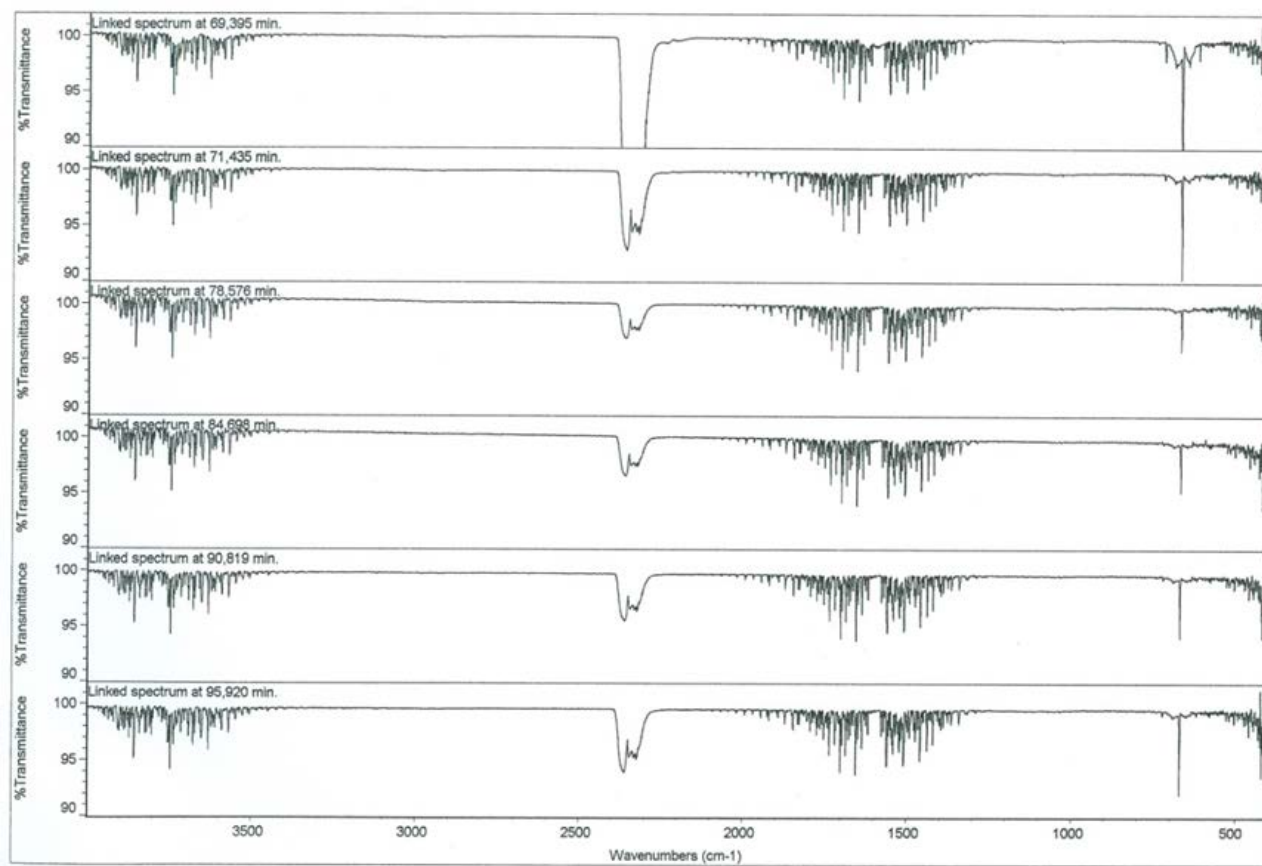

13

S4.7. Selected of four time-spaced IR spectra enhancing the production of methanol, during the step 3 (first two spectra) and the step 4 (the two below).

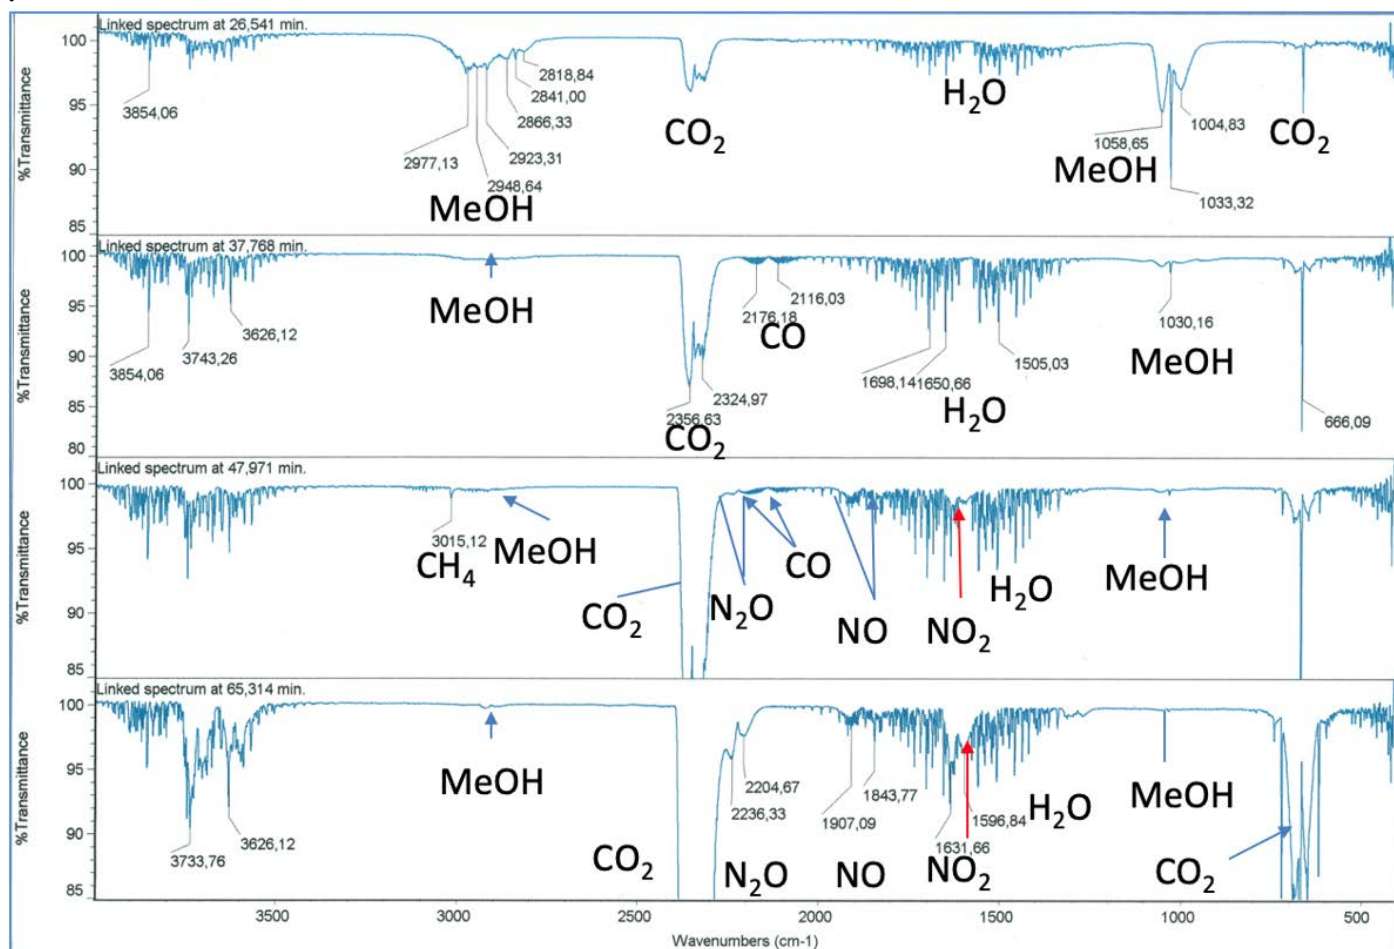

Supplement: s1 [file s1]
